# Supplementary material for: Cytoreductive treatment patterns among US veterans with polycythemia vera
Source: Springer Nature journal article supplement (doi:10.1186/s12885-018-4422-6), 2018-05-04
Supplement: MOESM1 [file 15739690]

## **Cytoreductive Treatment Patterns Among US Veterans With Polycythemia Vera**

Shreekant Parasuraman, BPharm, PhD,<sup>1</sup> Jingbo Yu, MHA, PhD,<sup>1</sup> Dilan Paranagama, PhD,<sup>1</sup> Sulena Shrestha, MPH,<sup>2</sup> Li Wang, PhD,<sup>2</sup> Onur Baser, PhD,<sup>2,3</sup> Robyn Scherber, MD, MPH<sup>4,5</sup>

<sup>1</sup>Incyte Corporation, Wilmington, DE; <sup>2</sup>STATinMED Research, Plano, TX; <sup>3</sup>Center for Innovation & Outcomes Research (CIOR), Columbia University, New York, NY; <sup>4</sup>Oregon Health and Sciences University, Portland, OR; <sup>5</sup>Department of Hematology and Oncology, Mayo Clinic, Scottsdale, AZ

### **Supplemental Table**

**Supplemental Table. Thrombotic and Cardiovascular Event Codes**

| <b>Event</b>                       | <b>ICD-9-CM Code</b>                                 |
|------------------------------------|------------------------------------------------------|
| <b>Thrombotic</b>                  |                                                      |
| Acute myocardial infarction        | 410.xx                                               |
| Deep vein thrombosis               | 451.1, 453.x                                         |
| Ischemic stroke                    | 434, 436, 437.0, 437.1, 438, 997.02                  |
| Peripheral arterial thrombosis     | 444.0, 444.1, 444.22, 444.81, 444.89, 445.02, 445.81 |
| Pulmonary embolism                 | 415.1x                                               |
| Superficial thrombophlebitis       | 451.0, 451.82                                        |
| Transient ischemic attack          | 435                                                  |
| <b>Cardiovascular</b>              |                                                      |
| Acute myocardial infarction        | 410.xx                                               |
| Coronary artery bypass graft       | CPT-4 codes: 33503-33545                             |
| Heart failure                      | 425.xx, 429.2, 428.xx, 429.9                         |
| Ischemic stroke                    | 434, 436, 437.0, 437.1, 438, 997.02                  |
| Percutaneous coronary intervention | 00.66, 36.09                                         |
| Transient ischemic attack          | 435                                                  |
| Unstable angina                    | 411.1, 411.81, 411.89                                |

*ICD-9-CM, International Classification of Diseases, Ninth Edition, Clinical Modification.*
